# 1 Top-down coordination of local cortical 2 state during selective attention

3 Jochem van Kempen<sup>1\*</sup>, Marc A. Gieselmann<sup>1</sup>, Michael Boyd<sup>1</sup>, Nicholas A. Steinmetz<sup>2</sup>, Tirin  
4 Moore<sup>3</sup>, Tatiana A. Engel<sup>4</sup>, Alexander Thiele<sup>1\*</sup>

## 5 Affiliations:

6 <sup>1</sup> Biosciences Institute, Newcastle University, Newcastle upon Tyne, United Kingdom.

7 <sup>2</sup> Department of Biological Structure, University of Washington, Seattle, WA, United States.

8 <sup>3</sup> Howard Hughes Medical Institute, Stanford University, CA, United States.

9 <sup>4</sup> Cold Spring Harbor Laboratory, Cold Spring Harbor, NY, United States.

10 \* [Jochem.van-kempen@newcastle.ac.uk](mailto:Jochem.van-kempen@newcastle.ac.uk), [Alex.Thiele@newcastle.ac.uk](mailto:Alex.Thiele@newcastle.ac.uk).

11

## 12 Abstract:

13 Spontaneous fluctuations in cortical excitability influence sensory processing and behavior.

14 These fluctuations, long known to reflect global changes in cortical state, were recently  
15 found to be modulated locally within a retinotopic map during spatially selective attention.

16 We found that periods of vigorous (On) and faint (Off) spiking activity, the signature of  
17 cortical state fluctuations, were coordinated across brain areas along the visual hierarchy  
18 and tightly coupled to their retinotopic alignment. During top-down attention, this

19 interareal coordination was enhanced and progressed along the reverse cortical hierarchy.

20 The extent of local state coordination between areas was predictive of behavioral  
21 performance. Our results show that cortical state dynamics are shared across brain regions,  
22 modulated by cognitive demands and relevant for behavior.

23

## 24 One Sentence Summary:

25 Interareal coordination of local cortical state is retinotopically precise and progresses in a  
26 reverse hierarchical manner during selective attention.

27

## 28 Main Text:

29 Cortical activity is not solely determined by external inputs but reflects ongoing fluctuations  
30 in neural excitability referred to as cortical state (Harris and Thiele, 2011; Kohn et al., 2009).  
31 Endogenous variability in cortical state shapes sensory responses and influences behavioral  
32 performance (Arieli et al., 1996; Gutnisky et al., 2017; McGinley et al., 2015a; Renart and  
33 Machens, 2014; Scholvinck et al., 2015). Although these fluctuations were long thought to  
34 be a global phenomenon that influences activity throughout the cortex (Harris and Thiele,  
35 2011; Lee and Dan, 2012), recent evidence has revealed that signatures of cortical state are  
36 modulated locally within the retinotopic map in Macaque V4 during selective attention  
37 (Engel et al., 2016). Cortical state fluctuations manifest in periods of vigorous (On) and faint  
38 (Off) spiking activity occurring synchronously across cortical laminae. Spatially selective  
39 attention directed towards the receptive fields (RFs) of the neural population modulates On-  
40 Off dynamics by increasing the duration of On episodes (Engel et al., 2016). Thus, cognitive  
41 demands that selectively affect targeted retinotopic locations can modulate local signatures  
42 of global cortical state fluctuations. However, perception and cognition depend on activity  
43 of many areas spanning the cortical hierarchy, which begs the question of whether cortical-  
44 state dynamics are coordinated across different brain regions during attention, whether this  
45 coordination progresses in a top-down or bottom-up manner, and whether it is relevant for  
46 behavior.

47 We recorded simultaneously from V1 and V4 using 16-contact laminar electrodes whilst  
48 three rhesus macaques performed a feature-based spatial attention task (Fig. 1A).  
49 Electrodes were inserted perpendicular to the cortical surface on a daily basis such that RFs  
50 overlapped both across all channels within each area and between the two areas (Fig. 1B &  
51 Fig. 1C). We characterized On-Off dynamics in each area individually by fitting a Hidden  
52 Markov Model (HMM) to the spike counts (10 ms bins) of multiunit activity (MUA) across  
53 included channels (supplementary material, Fig. 1D). In line with previous reports for V4  
54 (Engel et al., 2016), we found that a 2-phase model was the most parsimonious model for  
55 the majority of recordings (V1: 64 out of 77 recordings (83.1%), V4: 73 out of 79 recordings  
56 (92.4%), V1 and V4: 57 out of 73 recordings (78.1%), Fig. S1A-D). During these recordings,  
57 On-Off dynamics occurred without any obvious periodicity (Fig. S1E). When attention was  
58 directed towards the RFs under study, firing rates were higher during both Off and On

59 epochs [Wilcoxon signed rank test; V1: Off  $P = 10^{-164}$ , On  $P = 10^{-87}$ , V4: Off  $P = 10^{-184}$ , On  $P =$   
60  $10^{-103}$ ] (Fig. 1E), On-epoch durations increased in both V1 and V4 [Wilcoxon signed rank test;  
61 V1  $P = 10^{-13}$ , V4  $P = 10^{-8}$ ] and Off epoch durations increased in V1 but not V4 [Wilcoxon  
62 signed rank test; V1:  $P = 10^{-8}$ , V4  $P = 0.81$ ] (Fig. 1F). Additionally, when attention was  
63 directed towards the RFs, altogether more time was spent in an On phase (Fig. S2A) and  
64 transitions to an On phase were more likely (Fig. S2B).

65 We examined whether these spontaneous transitions were coordinated across visual areas.  
66 We computed cross-correlations between the V1 and V4 time series of On-Off phases (as  
67 estimated by the HMMs) during passive fixation (before stimulus onset) and during directed  
68 attention (after cue onset). During fixation, V1 and V4 transitions were coordinated but  
69 without either area leading/lagging the other [Wilcoxon signed rank test;  $P = 0.13$ ] (Fig. 2A).  
70 During directed attention, the coordination between V1 and V4 was enhanced and On-Off  
71 transitions more often occurred in V4 before they were followed in V1, as evident from the  
72 skew towards negative values of the V4 relative to V1 transition times [Wilcoxon signed  
73 rank test;  $P < 10^{-5}$ ] (Fig. 2A). The cross-correlation strength and skew was independent of  
74 microsaccades (Fig. S3), and the strength was inversely related to the separation between  
75 V1 and V4 RFs [ $r = -0.38$ ,  $P = 0.004$ ] (Fig. 2B). Thus, the strength of On-Off dynamics  
76 coordination between visual areas is tightly coupled to their retinotopic alignment. To  
77 further characterize this interareal coordination, we computed average firing rates in V1  
78 aligned to On-Off transition times in V4 and vice-versa. In line with transitions being driven  
79 in a top-down manner, V1 firing rate changes followed V4 transitions whereas V4 firing rate  
80 changes preceded V1 transitions (Fig. 2C). We also analyzed spiking activity simultaneously  
81 recorded with 16-contact linear electrodes inserted perpendicular to layers in V4 and  
82 tangential to layers in the frontal eye field (FEF) (or with single electrodes in FEF in some  
83 sessions) from two monkeys performing a selective attention task (V4 data reported  
84 previously in ref. (Engel et al., 2016)). A similar analysis revealed that changes of FEF firing  
85 rates precede On-Off transitions in V4 (Fig. 2D). These results suggest that On-Off transitions  
86 traverse from higher to lower areas along the visual hierarchy during selective attention.

87 To investigate the relationship between V1 and V4 On-Off transitions more closely, we fit a  
88 4-state HMM to V1 and V4 data simultaneously (HMM<sub>V1-V4</sub>), with the four HMM-states  
89 defined as (state 1) V1<sub>off</sub>-V4<sub>off</sub>, (state 2) V1<sub>on</sub>-V4<sub>off</sub>, (state 3) V1<sub>off</sub>-V4<sub>on</sub> and (state 4) V1<sub>on</sub>-V4<sub>on</sub>

90 (Fig. 3A). This model allowed us to investigate two specific scenarios (Fig. 3B). In the first  
91 scenario (yellow), we asked: from a situation in which both areas are in an Off phase (state  
92 1), is it more likely for V1 (state 2) or V4 (state 3) to transition (first) to an On phase? The  
93 second scenario (purple) addresses a related question: from a situation in which both areas  
94 are in an On phase (state 4), is it more likely for V1 (state 3) or V4 (state 2) to transition  
95 (first) to an Off state? The transition probabilities (Fig. 3C & Fig. 3D) revealed that when  
96 both areas were in an Off phase, it was more likely for V4 to transition to an On phase first  
97 [Wilcoxon signed rank test;  $P < 10^{-3}$ ]. Likewise, if both areas were in an On phase, it was  
98 more likely for V4 to transition to an Off phase first [Wilcoxon signed rank test;  $P < 10^{-3}$ ].  
99 Thus, when both areas are in the same phase, it is more likely for V4 to transition away from  
100 this phase first. This finding was, however, not specific to the attend RF condition, as we  
101 found similar results for each individual attention condition (attend RF and attend away), as  
102 well as during fixation (data not shown). Selective attention, however, modulated the  
103 transition probabilities from the yellow scenario. Specifically, it decreased the probability of  
104 transitioning from state 1 to state 2, and increased the probability of transitioning from  
105 state 1 to state 3 [Wilcoxon signed rank test;  $P < 10^{-2}$ ] (Fig. 3E & Fig. 3F). Finally, this model  
106 revealed that, although On-Off phases/transitions are correlated, each area spends a  
107 substantial fraction of time in opposite phases (Fig. 3G). Selective attention specifically  
108 decreases the time spent in state 1 whereas it increases the time spent in state 3 and state  
109 4, i.e. the states where V4 was in an On phase [Wilcoxon signed rank test; state 1  $P < 10^{-5}$ ,  
110 state 2  $P = 0.91$ , state 3  $P < 10^{-2}$ , state 4  $P < 10^{-3}$ ] (Fig. 3H).

111 On-Off dynamics furthermore related closely to measures of (bipolar re-referenced) local  
112 field potential (LFP) (de)synchronization. During On phases in either V1 or V4, low frequency  
113 ( $< \sim 20$  Hz) LFP power was suppressed and high frequency ( $> \sim 20$  Hz) power was increased,  
114 both in V1 and V4 (Fig. S4A-D). Additionally, LFP power spectra in both areas varied across  
115 the 4 states of HMM<sub>V1-V4</sub> (Fig. S4E-F). Here, we specifically investigated the difference in  
116 power spectra across states where the On-Off phase within an area remained constant, but  
117 differed in the other area. For example, we investigated the V1 LFP power spectra across  
118 states 1 and 3, wherein V1 was in an Off phase during both states, but V4 was either Off or  
119 On. This analysis revealed that the LFP power in V1 is modulated by V4 phase  
120 bidirectionally. If V1 was in either an On or an Off phase, a transition to an On phase in V4

121 increased V1 high-frequency power. A transition to an On phase in V1, however, only  
122 affected V4 high-frequency power when V4 was in an Off phase. When V4 was in an On  
123 phase, V1 phase did not affect high-frequency dynamics in V4. Thus, V4 phase influenced V1  
124 LFP regardless of V1 phase, whereas V1 phase affected high-frequency dynamics in V4 only  
125 during Off phases in V4.

126 In addition to selective attention, On-Off dynamics were linked to global arousal levels, as  
127 measured by pupil diameter (Aston-Jones and Cohen, 2005; McGinley et al., 2015a, 2015b;  
128 Reimer et al., 2014; Vinck et al., 2015). For each area individually, On epoch durations were  
129 longer on trials with larger baseline pupil diameter (Fig. S5A-C), in line with previous results  
130 (Engel et al., 2016). Furthermore, pupil diameter was predictive of On-Off dynamics  
131 coordination. Larger baseline pupil diameter was predictive of shorter epoch durations for  
132 HMM<sub>V1-V4</sub> state 1 (where both areas were Off) and longer state 4 epoch durations (where  
133 both areas were On) (Fig. S5D). Central arousal, in addition to focused attention, thus  
134 specifically influenced epoch durations for states where V1 and V4 phase were aligned.  
135 Importantly, pupil diameter did not differ between attention conditions (Fig. S5E), while  
136 cortical state did. This shows that effects of arousal and attention on On-Off dynamics are  
137 independently controlled.

138 We have demonstrated that the coordination of On-Off dynamics is retinotopically  
139 organized and driven in a top-down manner during selective attention. Is this organization  
140 also relevant for behavior? For both V1 and V4 individually, the On/Off phase at the time of  
141 target dimming was predictive of reaction time (RT) when the target was presented inside  
142 the RFs. We found an interaction between attention and On/Off phase [linear mixed effects  
143 model; V1  $\beta = 0.16 \pm 0.06$ ,  $P = 0.006$ , V4  $\beta = 0.13 \pm 0.06$ ,  $P = 0.03$ ] with a main effect for phase  
144 [V1  $\beta = -0.27 \pm 0.09$ ,  $P = 0.002$ , V4  $\beta = -0.26 \pm 0.09$ ,  $P = 0.004$ ], but no main effect of attention  
145 [V1  $\beta = -0.15 \pm 0.09$ ,  $P = 0.09$ , V4  $\beta = -0.1 \pm 0.09$ ,  $P = 0.28$ ]. Specifically, when either area was in  
146 an On phase when the target grating dimmed, RT was faster [Wilcoxon signed rank test; V1  
147  $P = 0.001$ , V4  $P < 10^{-4}$ ] (Fig. 4A). We furthermore found that On-Off phase coordination  
148 between V1 and V4, as assessed using HMM<sub>V1-V4</sub>, was also predictive of behavioral  
149 performance. Again we found an interaction between attention and On/Off phase [linear  
150 mixed effects model;  $\beta = 0.08 \pm 0.02$ ,  $P < 10^{-3}$ ], with a main effect of phase [ $\beta = -0.15 \pm 0.04$ ,  $P$   
151  $< 10^{-4}$ ], but not of attention [ $\beta = -0.07 \pm 0.07$ ,  $P = 0.24$ ]. Performance was worst when at the

152 time of target dimming both V1 and V4 were in an Off phase (state 1). Performance  
153 improved when either area was in an On phase, and it improved even further when both  
154 areas were in an On phase at the time of target dimming (Fig. 4B). The coordination of On-  
155 Off dynamics across visual areas is thus more beneficial for behavioral performance than the  
156 state in either area alone.

157 In line with previous results (Engel et al., 2016), we show that transitions between On and  
158 Off phases in V4 are modulated locally by spatially selective attention. In addition, we found  
159 that they also occur in primary visual cortex (V1). Importantly, we show that interareal  
160 coordination of On-Off dynamics occurs at a local retinotopic scale, which reflects the  
161 precision of anatomical connections, and is driven in a top-down manner across areas FEF,  
162 V4 and V1 during selective attention. Fluctuations in cortical state have previously been  
163 ascribed to neuromodulatory influences (Buzsaki et al., 1988; Constantinople and Bruno,  
164 2011; Lee and Dan, 2012) and feedback projections (Zagha et al., 2013). On-Off dynamics  
165 relate to both these mechanisms as pupil diameter, associated with neuromodulatory  
166 regulation of network state (Aston-Jones and Cohen, 2005; de Gee et al., 2017; Eldar et al.,  
167 2013; Joshi et al., 2016; Murphy et al., 2014; Reimer et al., 2016; Varazzani et al., 2015), and  
168 top-down retinotopic alignment, probably driven by feedback mechanisms (Zagha et al.,  
169 2013), are predictive of cortical state fluctuations.

170 The interareal coordination of On-Off dynamics and its relevance to behavioral performance  
171 suggests that trial-by-trial coordination of activity across brain regions is beneficial for  
172 information transfer and selectively modulated according to task demands. Across-area  
173 oscillatory activity is correlated according to both retinotopy and stimulus selectivity (Lewis  
174 et al., 2016). Selective attention modulates this interareal coherence (Bosman et al., 2012;  
175 Buschman and Miller, 2007; Gregoriou et al., 2009), potentially facilitating communication  
176 between hierarchically linked areas (Fries, 2005). Although attention can reduce within-area  
177 spike count correlations (Cohen and Maunsell, 2009; Herrero et al., 2013; Mitchell et al.,  
178 2009), depending on the signal correlation between neuronal pairs (Rabinowitz et al., 2015;  
179 Ruff and Cohen, 2014), it increases correlated variability across functionally related areas  
180 (Oemisch et al., 2015; Ruff and Cohen, 2016). This increased coordination might be a  
181 prerequisite for successful interareal information transfer (Harris and Mrsic-Flogel, 2013)  
182 and might allow propagation of sensory information to other brain regions (Luczak et al.,

183 2013). When hierarchically linked areas are simultaneously active, potentially driven by the  
184 frontal cortex, global representation of information through recurrent processing could be  
185 facilitated, thereby aiding conscious stimulus processing (Baars, 2002; Dehaene and  
186 Changeux, 2011). Cognitive modulation of cortical state coordination could be a key  
187 component of this.

188

## 189 References

- 190 Arieli A, Sterkin A, Grinvald A, Aertsen A. 1996. Dynamics of Ongoing Activity:  
191 Explanation of the Large Variability in Evoked Cortical Responses. *Science (80- )*  
192 **273**:1868–1871. doi:10.1126/science.273.5283.1868
- 193 Aston-Jones G, Cohen JD. 2005. An integrative theory of locus coeruleus-norepinephrine  
194 function: adaptive gain and optimal performance. *Annu Rev Neurosci* **28**:403–50.  
195 doi:10.1146/annurev.neuro.28.061604.135709
- 196 Baars BJ. 2002. The Conscious Access Hypothesis. *Trends Cogn Sci* **6**:47–52.  
197 doi:10.1016/S1364-6613(00)01819-2
- 198 Benjamini Y, Yekutieli D. 2001. The control of the false discovery rate in multiple testing  
199 under dependency. *Ann Stat* **29**:1165–1188. doi:10.1214/aos/1013699998
- 200 Bishop CM. 2006. *Pattern Recognition and Machine Learning*. Springer.
- 201 Bokil H, Andrews P, Kulkarni JE, Mehta S, Mitra PP. 2010. Chronux: A platform for  
202 analyzing neural signals. *J Neurosci Methods* **192**:146–151.  
203 doi:10.1016/j.jneumeth.2010.06.020
- 204 Bosman CA, Schoffelen J-M, Brunet N, Oostenveld R, Bastos AM, Womelsdorf T, Rubehn  
205 B, Stieglitz T, De Weerd P, Fries P. 2012. Attentional Stimulus Selection through  
206 Selective Synchronization between Monkey Visual Areas. *Neuron* **75**:875–888.  
207 doi:10.1016/j.neuron.2012.06.037
- 208 Buschman TJ, Miller EK. 2007. Top-Down Versus Bottom-Up Control of Attention in the  
209 Prefrontal and Posterior Parietal Cortices. *Science (80- )* **315**:1860–1862.  
210 doi:10.1126/science.1138071
- 211 Buzsaki G, Bickford R, Ponomareff G, Thal L, Mandel R, Gage F. 1988. Nucleus basalis and  
212 thalamic control of neocortical activity in the freely moving rat. *J Neurosci* **8**:4007–  
213 4026. doi:10.1523/JNEUROSCI.08-11-04007.1988
- 214 Cohen MR, Maunsell JHR. 2009. Attention improves performance primarily by reducing  
215 interneuronal correlations. *Nat Neurosci* **12**:1594–1600. doi:10.1038/nn.2439
- 216 Constantinople CM, Bruno RM. 2011. Effects and mechanisms of wakefulness on local  
217 cortical networks. *Neuron* **69**:1061–1068. doi:10.1016/j.neuron.2011.02.040
- 218 de Gee JW, Colizoli O, Kloosterman NA, Knapen T, Nieuwenhuis S, Donner TH. 2017.  
219 Dynamic modulation of decision biases by brainstem arousal systems. *Elife* **6**:1–36.  
220 doi:10.7554/eLife.23232

- 221 Dehaene S, Changeux J-P. 2011. Experimental and Theoretical Approaches to Conscious  
222 Processing. *Neuron* **70**:200–227. doi:10.1016/j.neuron.2011.03.018
- 223 Eldar E, Cohen JD, Niv Y. 2013. The effects of neural gain on attention and learning. *Nat*  
224 *Neurosci* **16**:1146–1153. doi:10.1038/nn.3428
- 225 Engbert R, Kliegl R. 2003. Microsaccades uncover the orientation of covert attention. *Vision*  
226 *Res.* doi:10.1016/S0042-6989(03)00084-1
- 227 Engel TA, Steinmetz NA, Gieselmann MA, Thiele A, Moore T, Boahen K. 2016. Selective  
228 modulation of cortical state during spatial attention. *Science (80- )* **354**:1140–1144.  
229 doi:10.1126/science.aag1420
- 230 Fries P. 2005. A mechanism for cognitive dynamics: Neuronal communication through  
231 neuronal coherence. *Trends Cogn Sci* **9**:474–480. doi:10.1016/j.tics.2005.08.011
- 232 Gieselmann MA, Thiele A. 2008. Comparison of spatial integration and surround suppression  
233 characteristics in spiking activity and the local field potential in macaque V1. *Eur J*  
234 *Neurosci* **28**:447–459. doi:10.1111/j.1460-9568.2008.06358.x
- 235 Gray H, Bertrand H, Mindus C, Flecknell P, Rowe C, Thiele A. 2016. Physiological,  
236 Behavioral, and Scientific Impact of Different Fluid Control Protocols in the Rhesus  
237 Macaque (*Macaca mulatta*). *Eneuro* **3**:1–15.
- 238 Gregoriou GG, Gotts SJ, Zhou H, Desimone R. 2009. High-frequency, long-range coupling  
239 between prefrontal and visual cortex during attention. *Science* **324**:1207–1210.  
240 doi:10.1126/science.1171402
- 241 Gutnisky DA, Beaman CB, Lew SE, Dragoi V. 2017. Spontaneous Fluctuations in Visual  
242 Cortical Responses Influence Population Coding Accuracy. *Cereb Cortex* **27**:1409–  
243 1427. doi:10.1093/cercor/bhv312
- 244 Harris KD, Mrsic-Flogel TD. 2013. Cortical connectivity and sensory coding. *Nature*  
245 **503**:51–8. doi:10.1038/nature12654
- 246 Harris KD, Thiele A. 2011. Cortical state and attention. *Nat Rev Neurosci* **12**:509–523.  
247 doi:10.1038/nrn3084
- 248 Herrero JL, Gieselmann M a, Sanayei M, Thiele A. 2013. Attention-induced variance and  
249 noise correlation reduction in macaque v1 is mediated by NMDA receptors. *Neuron*  
250 **78**:729–739. doi:10.1016/j.neuron.2013.03.029
- 251 Joshi S, Li Y, Kalwani RM, Gold JJ. 2016. Relationships between Pupil Diameter and  
252 Neuronal Activity in the Locus Coeruleus, Colliculi, and Cingulate Cortex. *Neuron*  
253 **89**:221–234. doi:10.1016/j.neuron.2015.11.028
- 254 Kohn A, Zandvakili A, Smith MA. 2009. Correlations and brain states: from  
255 electrophysiology to functional imaging. *Curr Opin Neurobiol* **19**:434–438.  
256 doi:10.1016/j.conb.2009.06.007
- 257 Lee S-H, Dan Y. 2012. Neuromodulation of Brain States. *Neuron* **76**:209–222.  
258 doi:10.1016/j.neuron.2012.09.012
- 259 Lewis CM, Bosman CA, Womelsdorf T, Fries P. 2016. Stimulus-induced visual cortical  
260 networks are recapitulated by spontaneous local and interareal synchronization. *Proc*  
261 *Natl Acad Sci U S A* **113**:E606–E615. doi:10.1073/pnas.1513773113
- 262 Logothetis NK, Kayser C, Oeltermann A. 2007. In Vivo Measurement of Cortical Impedance  
263 Spectrum in Monkeys: Implications for Signal Propagation. *Neuron* **55**:809–823.



- 264 doi:10.1016/j.neuron.2007.07.027
- 265 Luczak A, Bartho P, Harris KD. 2013. Gating of Sensory Input by Spontaneous Cortical  
266 Activity. *J Neurosci* **33**:1684–1695. doi:10.1523/jneurosci.2928-12.2013
- 267 McGinley MJ, David S V., McCormick DA. 2015a. Cortical Membrane Potential Signature  
268 of Optimal States for Sensory Signal Detection. *Neuron* **87**:179–192.  
269 doi:10.1016/j.neuron.2015.05.038
- 270 McGinley MJ, Vinck M, Reimer J, Batista-Brito R, Zaghera E, Cadwell CR, Tolias AS, Cardin  
271 JA, McCormick DA. 2015b. Waking State: Rapid Variations Modulate Neural and  
272 Behavioral Responses. *Neuron* **87**:1143–1161. doi:10.1016/j.neuron.2015.09.012
- 273 Mitchell JF, Sundberg K a, Reynolds JH. 2009. Spatial attention decorrelates intrinsic  
274 activity fluctuations in macaque area V4. *Neuron* **63**:879–88.  
275 doi:10.1016/j.neuron.2009.09.013
- 276 Mountcastle VB. 1957. Modality and topographic properties of single neurons of cat’s  
277 somatic sensory cortex. *J Neurophysiol* **20**:408–34. doi:10.1152/jn.1957.20.4.408
- 278 Murphy PR, O’Connell RG, O’Sullivan M, Robertson IH, Balsters JH. 2014. Pupil diameter  
279 covaries with BOLD activity in human locus coeruleus. *Hum Brain Mapp* **35**:4140–  
280 4154. doi:10.1002/hbm.22466
- 281 Oemisch M, Westendorff S, Everling S, Womelsdorf T. 2015. Interareal Spike-Train  
282 Correlations of Anterior Cingulate and Dorsal Prefrontal Cortex during Attention Shifts.  
283 *J Neurosci* **35**:13076–13089. doi:10.1523/jneurosci.1262-15.2015
- 284 Pettersen KH, Devor A, Ulbert I, Dale AM, Einevoll GT. 2006. Current-source density  
285 estimation based on inversion of electrostatic forward solution: Effects of finite extent of  
286 neuronal activity and conductivity discontinuities. *J Neurosci Methods* **154**:116–133.  
287 doi:10.1016/j.jneumeth.2005.12.005
- 288 Rabiner LR. 1989. A tutorial on hidden Markov models and selected applications in speech  
289 recognition. *Proc IEEE* **77**:257–286. doi:10.1109/5.18626
- 290 Rabinowitz NC, Goris RL, Cohen M, Simoncelli EP. 2015. Attention stabilizes the shared  
291 gain of V4 populations. *Elife* **4**:1–24. doi:10.7554/eLife.08998
- 292 Reimer J, Froudarakis E, Cadwell CR, Yatsenko D, Denfield GH, Tolias AS. 2014. Pupil  
293 Fluctuations Track Fast Switching of Cortical States during Quiet Wakefulness. *Neuron*  
294 **84**:355–362. doi:10.1016/j.neuron.2014.09.033
- 295 Reimer J, McGinley MJ, Liu Y, Rodenkirch C, Wang Q, McCormick DA, Tolias AS. 2016.  
296 Pupil fluctuations track rapid changes in adrenergic and cholinergic activity in cortex.  
297 *Nat Commun* **7**:13289. doi:10.1038/ncomms13289
- 298 Renart A, Machens CK. 2014. Variability in neural activity and behavior. *Curr Opin*  
299 *Neurobiol* **25**:211–220. doi:10.1016/j.conb.2014.02.013
- 300 Roelfsema PR, Tolboom M, Khayat PS. 2007. Different Processing Phases for Features,  
301 Figures, and Selective Attention in the Primary Visual Cortex. *Neuron* **56**:785–792.  
302 doi:10.1016/j.neuron.2007.10.006
- 303 Ruff DA, Cohen MR. 2016. Attention Increases Spike Count Correlations between Visual  
304 Cortical Areas. *J Neurosci* **36**:7523–7534. doi:10.1523/JNEUROSCI.0610-16.2016
- 305 Ruff DA, Cohen MR. 2014. Attention can either increase or decrease spike count correlations  
306 in visual cortex. *Nat Neurosci* **17**:1591–1597. doi:10.1038/nn.3835

- 307 Scholvinck ML, Saleem AB, Benucci A, Harris KD, Carandini M. 2015. Cortical State  
308 Determines Global Variability and Correlations in Visual Cortex. *J Neurosci* **35**:170–  
309 178. doi:10.1523/JNEUROSCI.4994-13.2015
- 310 Schroeder C. 1998. A spatiotemporal profile of visual system activation revealed by current  
311 source density analysis in the awake macaque. *Cereb Cortex* **8**:575–592.  
312 doi:10.1093/cercor/8.7.575
- 313 Schroeder CE, Tenke CE, Givre SJ, Arezzo JC, Vaughan HG. 1991. Striate cortical  
314 contribution to the surface-recorded pattern-reversal vep in the alert monkey. *Vision Res*  
315 **31**:1143–1157. doi:10.1016/0042-6989(91)90040-C
- 316 Self MW, van Kerkoerle T, Supèr H, Roelfsema PR. 2013. Distinct Roles of the Cortical  
317 Layers of Area V1 in Figure-Ground Segregation. *Curr Biol* **23**:2121–2129.  
318 doi:10.1016/j.cub.2013.09.013
- 319 Thiele A, Delicato LS, Roberts MJ, Gieselmann MA. 2006. A novel electrode-pipette design  
320 for simultaneous recording of extracellular spikes and iontophoretic drug application in  
321 awake behaving monkeys. *J Neurosci Methods* **158**:207–211.  
322 doi:10.1016/j.jneumeth.2006.05.032
- 323 Varazzani C, San-Galli A, Gilardeau S, Bouret S. 2015. Noradrenaline and Dopamine  
324 Neurons in the Reward/Effort Trade-Off: A Direct Electrophysiological Comparison in  
325 Behaving Monkeys. *J Neurosci* **35**:7866–7877. doi:10.1523/JNEUROSCI.0454-15.2015
- 326 Vinck M, Batista-Brito R, Knoblich U, Cardin JA. 2015. Arousal and Locomotion Make  
327 Distinct Contributions to Cortical Activity Patterns and Visual Encoding. *Neuron*  
328 **86**:740–754. doi:10.1016/j.neuron.2015.03.028
- 329 Zaghera E, Casale AE, Sachdev RNS, McGinley MJ, McCormick DA. 2013. Motor cortex  
330 feedback influences sensory processing by modulating network state. *Neuron* **79**:567–  
331 578. doi:10.1016/j.neuron.2013.06.008

332

### 333 Acknowledgments:

334 We thank Demetrio Ferro for advice on data analysis.

### 335 Funding:

336 Funded by Wellcome trust 093104 (JvK, MAG, AT), MRC MR/P013031/1 (JvK, MAG, AT), NIH  
337 grant R01 EB026949 (TAE) and the Pershing Square Foundation (TAE), NIH grant EY014924  
338 (NAS and TM).

### 339 Author contributions:

340 Jochem van Kempen: Conceptualization, Methodology, Formal analysis, Investigation, Data  
341 Curation, Writing – original draft preparation, Writing – review and editing, Visualization

- 342 Marc A. Gieselmann: Software, Writing – review and editing, Supervision
- 343 Michael Boyd: Investigation
- 344 Nicholas A. Steinmetz: Investigation, Writing – review and editing
- 345 Tirin Moore: Resources, Writing – review and editing, Funding acquisition
- 346 Tatiana A. Engel: Conceptualization, Methodology, Software, Writing – review and editing,  
347 Supervision
- 348 Alexander Thiele: Conceptualization, Investigation, Resources, Writing – review and editing,  
349 Supervision, Funding acquisition
- 350 [Competing interests:](#)
- 351 There are no competing interests.
- 352 [Data and materials availability:](#)
- 353 Data and materials are available upon request.
- 354

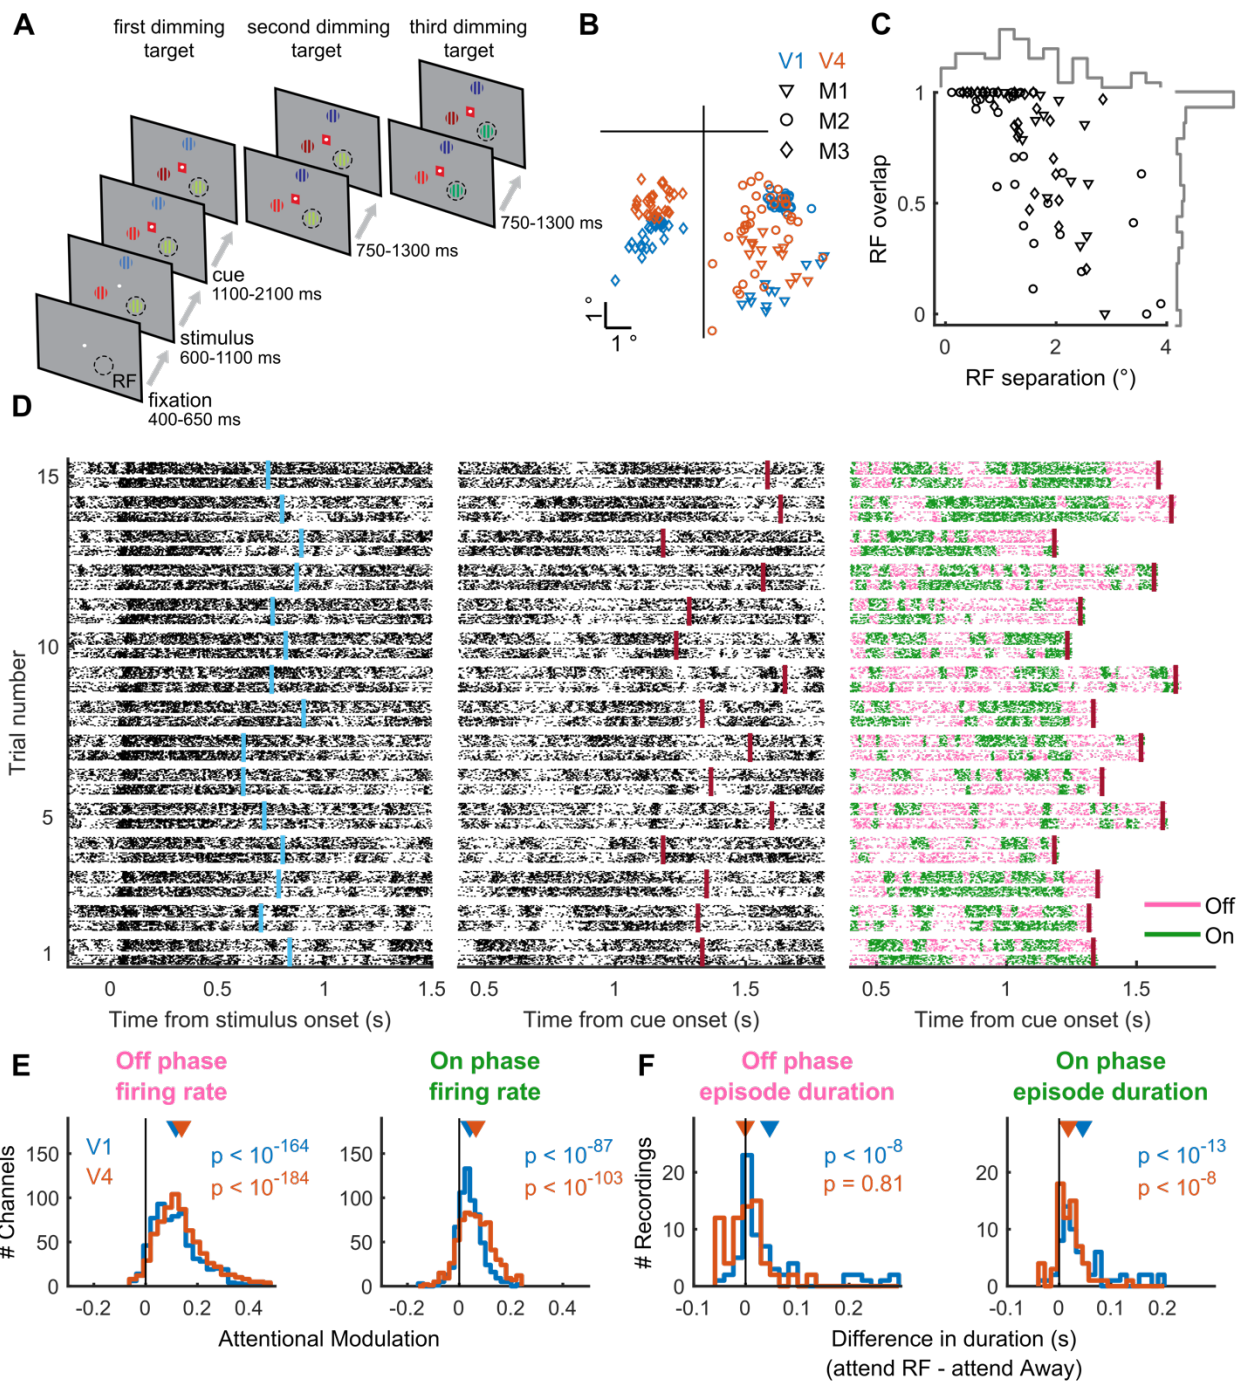

355

356 **Fig. 1. On-Off dynamics in V1 and V4 are modulated during selective attention. (A)**

357 Behavioral paradigm. The monkey held a lever to initiate the trial, hereafter a central  
 358 fixation spot was turned on. Upon fixation 3 colored gratings appeared, one was presented  
 359 inside the receptive fields (RFs) of the V1 neurons. After a variable delay a cue matching one  
 360 of the grating colors surrounded the fixation spot, indicating which grating was behaviorally  
 361 relevant (target). In pseudorandom order the stimuli decreased in luminance (dimmed).

362 Upon dimming of the target, the monkey had to release the lever. (B) Average RF center

363 locations (across channels) for each recording, separately for each subject (M1-M3) and  
364 area. **(C)** RF separation between V1 and V4 plotted against their overlap, expressed as the  
365 proportion of the V1 RF. The histograms along the top (right) indicate the distribution of RF  
366 separation (overlap) across all recordings. **(D)** Raster plot of HMM fit to population activity  
367 in V1 and V4. Simultaneously recorded multi-unit spiking activity on 16-contact laminar  
368 electrodes in V1 and V4 for 15 example trials, aligned to stimulus (left) and cue onset  
369 (middle and right). Each trial shows across laminar activity in V1 (bottom) and V4 (top), as  
370 raster plots (left two columns) color coded according to HMM estimation of On and Off  
371 phases (right). Middle and right columns depict the same activity. The HMM was fit from  
372 400 ms after cue onset to 30 ms after the first dimming event. Cue onset and first-dimming  
373 are indicated for each trial by purple and red vertical bars respectively. **(E)** Attention  
374 increases firing rates during Off and On phases, both in V1 and V4. **(F)** Attention increases  
375 the duration of On episodes, both in V1 and V4, whereas it increases the duration of Off  
376 episodes only in V1. Statistics: Wilcoxon signed rank test.

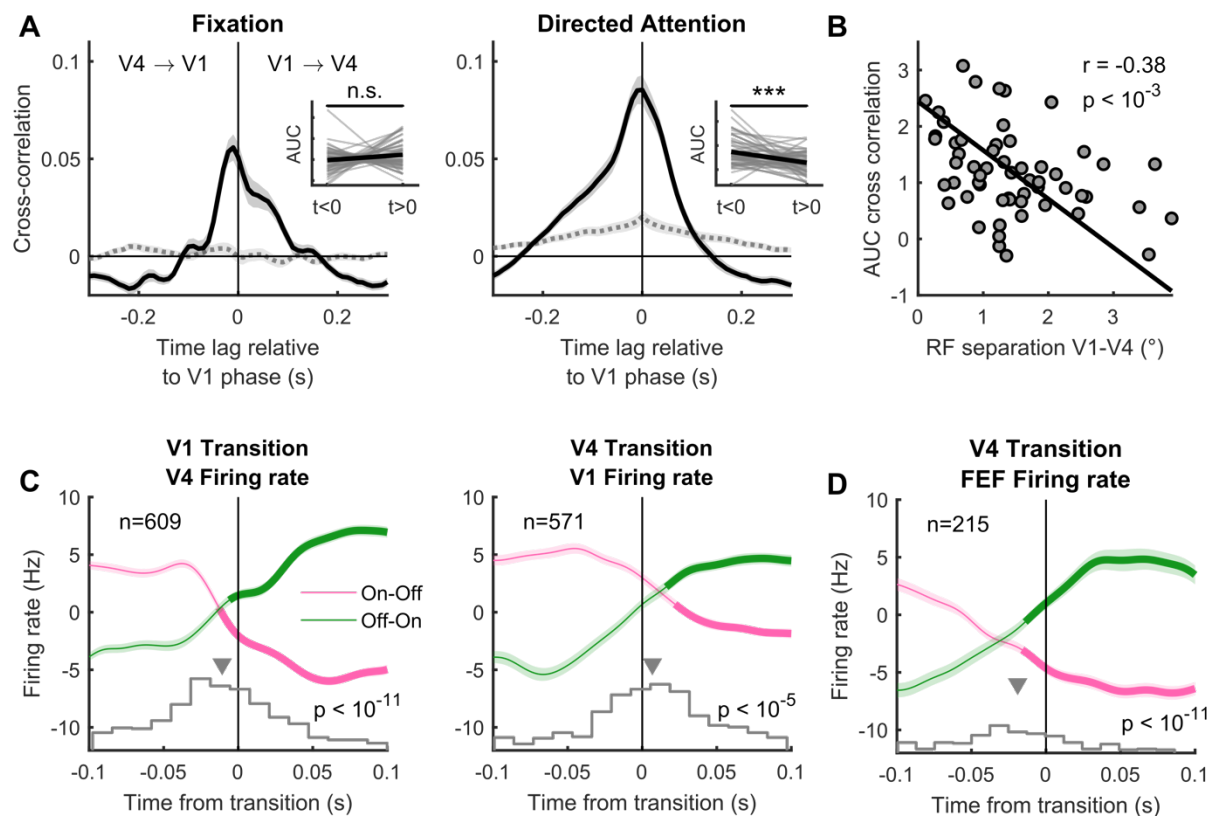

377

378 **Fig. 2. Across area coordination of cortical state.** (A) Cross-correlation between time series  
 379 of On-Off phases in V1 and V4 relative to V1 phase during passive fixation (left) and after  
 380 cue onset (right). Insets show the area under the cross-correlation curve for times smaller  
 381 and larger than zero. The dashed grey line depicts the shuffle predictor. (B) RF separation  
 382 plotted against the area under the cross-correlation curve during attention (from the right  
 383 panel A). The line indicates the standardized major axis regression fit. (C) Spiking activity in  
 384 one area aligned to state transitions in the other area, averaged across channels and  
 385 recordings. Only epochs without transitions preceding or following the alignment transition  
 386 within 100 ms were included. Thick green and pink lines indicate the times the firing rate  
 387 was higher (green) or lower (pink) than the average rate. Along the bottom are the  
 388 histograms of the crossing point of two straight lines fit (least-squares) to the transition-  
 389 aligned multi-unit firing rate. (D) Conventions as in C, but from a different dataset in which  
 390 activity was recorded simultaneously from V4 and FEF. Statistics: Wilcoxon signed rank test  
 391 (A), Pearson correlation (B) and FDR-corrected, one-sided, Wilcoxon signed rank test (C &  
 392 D). Shaded regions denote  $\pm 1$  SEM.

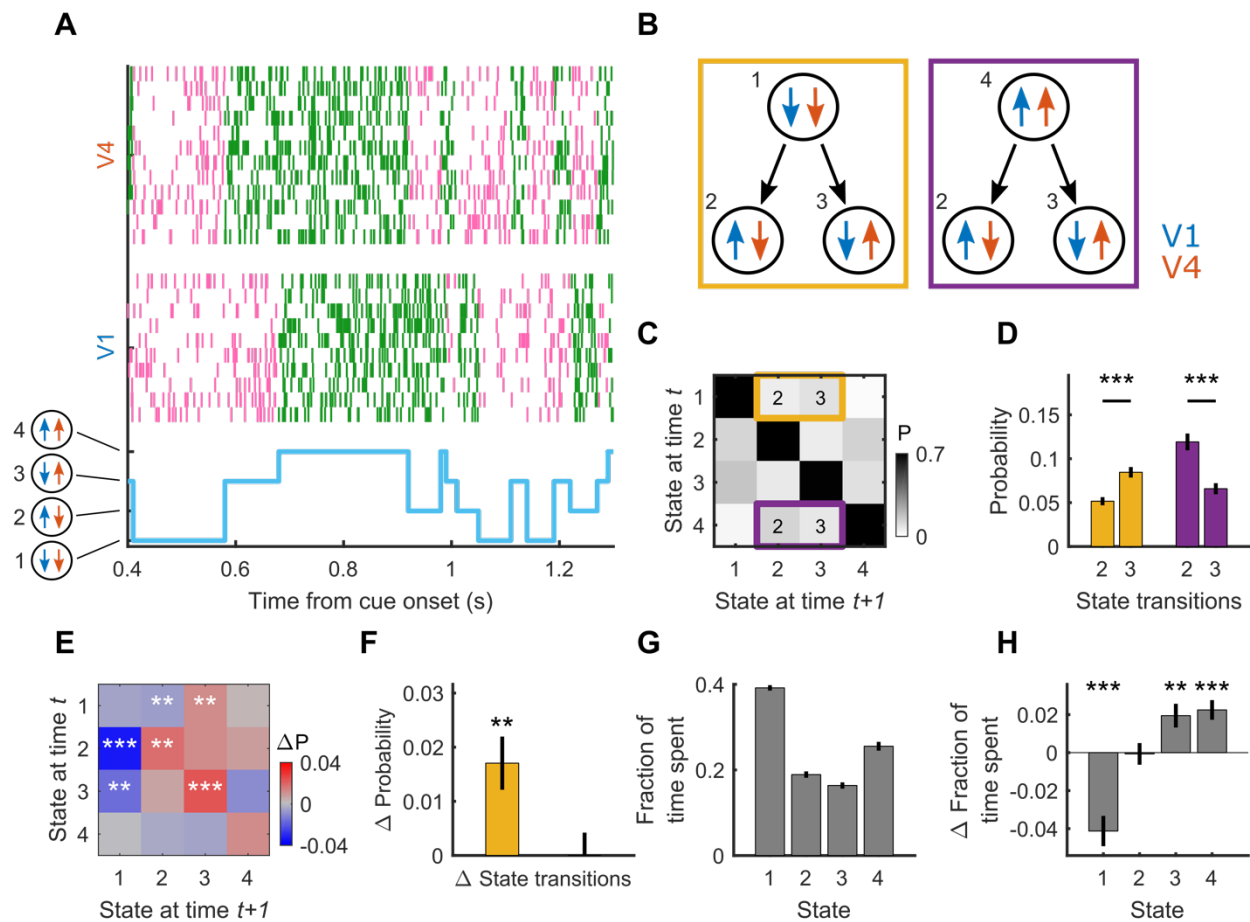

393

394 **Fig. 3. HMM with 4 states fit simultaneously to V1 and V4 data.** (A) Example trial with the  
 395 HMM state-trajectory (bottom) and across-laminar raster plot for V1 (middle) and V4 (top).  
 396 (B) Schematic describing scenarios for testing two questions: (1, left yellow box) from a  
 397 state where both V1 and V4 are Off, is it more likely for V1 or V4 to transition to the On  
 398 phase first? (2, right purple box) from a state where both V1 and V4 are On, is it more likely  
 399 for V1 or V4 to transition to the Off phase first? (C) HMM transition probability matrix,  
 400 indicating the probability of staying in a state (diagonal) or transitioning from one state to  
 401 another. Highlighted are scenarios set out in panel B. (D) Transition probabilities indicated in  
 402 panels B and C. (E) Attentional influence on state-transition probabilities: shown is the  
 403 difference transition matrix (attend RF – attend Away). (F) Attentional influence (attend RF –  
 404 attend Away) on the difference between state transition probabilities (state 3 – state 2) for  
 405 each of the two scenarios indicated in panels B, C and D. Selective attention increases the  
 406 difference between the transition probabilities for state 2 and 3 for the yellow, but not the  
 407 purple scenario. (G) The fraction of time spent in each of the 4 states. (H) The difference in

408 time spent in each of the 4 states when attention is directed towards or away from the RF  
409 (attend RF – attend Away). Statistics: Wilcoxon signed rank test (FDR corrected), error bars  
410 denote  $\pm 1$  SEM across recordings; \*, \*\*, \*\*\* indicate significance levels ( $p < 0.05$ ,  $p < 0.01$   
411 and  $p < 0.001$ , respectively).



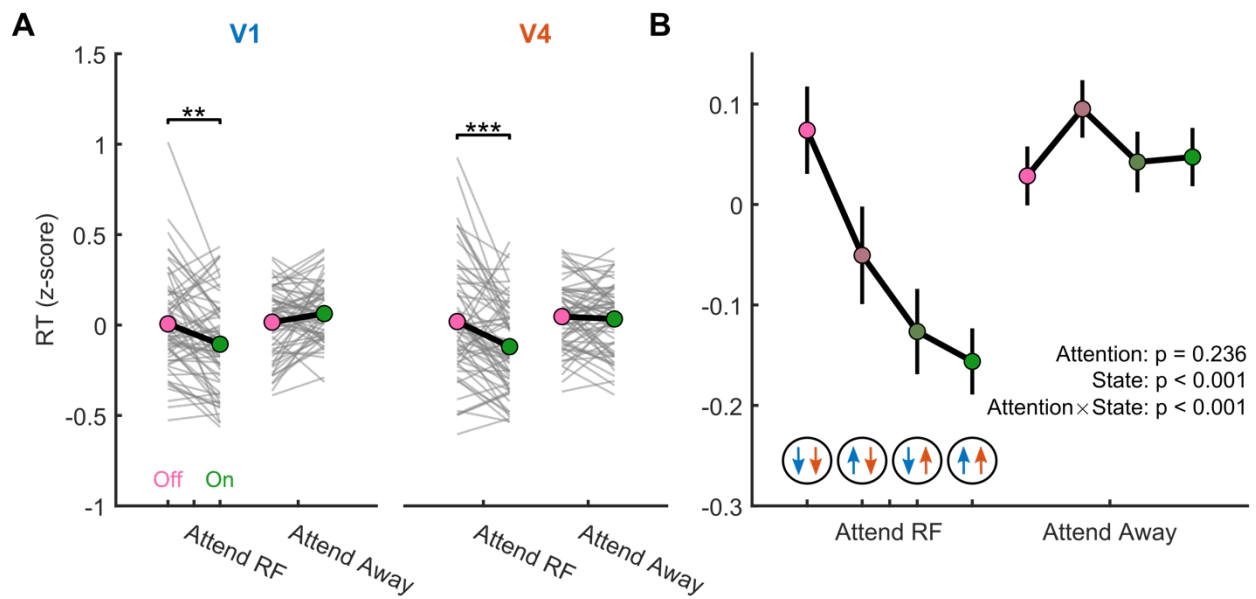

412

413 **Fig. 4. Across-area coordination of On-Off dynamics predicts behavioral performance. (A)**

414 On vs. Off phase of population activity at the time of target dimming, determined

415 individually for V1 and V4, predicts behavioral performance. RT decreases when attention is

416 directed towards the RFs and either V1 or V4 is in an On phase. **(B)** RT decreased from when

417 both areas were Off, through V1 On - V4 Off, through V1 Off - V4 On, to V1 and V4 On when

418 attention was directed towards the RFs. Statistics: Wilcoxon signed rank test **(A)**, and

419 multilevel linear mixed effect model **(B)**. Error bars denote  $\pm 1$  SEM, and \*, \*\* and \*\*\*

420 indicate FDR corrected significance levels of  $p < 0.05$ ,  $p < 0.01$  and  $p < 0.001$ , respectively.

421

## 422 Materials and Methods

### 423 Animals and procedures

424 Subjects in our study were 3 male rhesus macaque monkeys (*Macaca mulatta*, age 10-12  
425 years, weight 8.5-12.5 kg). All animal procedures were performed in accordance with the  
426 European Communities Council Directive RL 2010/63/EC, the National Institute of Health's  
427 Guidelines for the Care and Use of Animals for Experimental Procedures, and the UK  
428 Animals Scientific Procedures Act. Animals were motivated to engage in the task through  
429 fluid control at levels that do not affect animal physiology and have minimal impact on  
430 psychological wellbeing (Gray et al., 2016).

431

### 432 Surgical preparation

433 The animals were implanted with a head post and recording chambers over area V1 and V4  
434 under sterile conditions and general anesthesia. Surgical procedures and postoperative care  
435 conditions have been described in detail previously (Thiele et al., 2006).

436

### 437 Behavioral paradigm

438 Stimulus presentation and behavioral control was regulated by Remote Cortex 5.95  
439 (Laboratory of Neuropsychology, National Institute for Mental Health, Bethesda, MD).  
440 Stimuli were presented on a cathode ray tube (CRT) monitor at 120 Hz, 1280 × 1024 pixels,  
441 at a distance of 54 cm. The location and size of receptive field (RF) were measured as  
442 described previously (Gieselmann and Thiele, 2008), using a reverse correlation method.  
443 Briefly, during fixation, a series of black squares (0.5-2° size, 100% contrast) were presented  
444 for 100 ms at pseudorandom locations on a 9 × 12 grid (5-25 repetitions for each location)  
445 on a bright background. RF eccentricity ranged from 3.4 - 7.5° in V1, and from 2.5 to 8.9° in  
446 V4.

447 During the main task (Fig. 1A), the monkeys initiated a trial by holding a lever and fixating on  
448 a central white fixation spot (0.1°) displayed on a gray background (1.41 cd/m<sup>2</sup>). After a  
449 fixed delay (614, 424, 674 ms, for monkeys 1, 2 and 3), three colored (for color values see  
450 Table S1) square wave gratings appeared equidistant from the fixation spot, one was

451 centered on the RF of the V1 neurons under study. The locations of colored gratings were  
452 fixed for each recording session but were pseudorandomly assigned across sessions.  
453 Stimulus size varied between 2 and 4° diameter, depending on RF eccentricity and size. For  
454 most recordings we used drifting gratings but presented one monkey with stationary  
455 gratings during 22 out of 34 recording days. The drifting gratings moved perpendicular to  
456 the grating orientation, with the motion direction pseudorandomly assigned on every trial.  
457 After a random delay (618-1131 ms for monkey 1, 618-948 ms for monkeys 2 and 3;  
458 uniformly distributed), a central cue appeared that matched the color of one of the gratings,  
459 indicating that this grating would be behaviorally relevant on the current trial. After a  
460 variable delay (1162-2133 ms for monkey 1, 1162-1822 ms for monkeys 2 and 3; uniformly  
461 distributed), one of the pseudorandomly selected gratings changed luminance (for color  
462 values see Table S1), referred to as dimming. If the cued grating (target) dimmed, the  
463 monkey had to release the lever in order to obtain a reward. If, however, a non-cued grating  
464 (distractor) dimmed, the monkey had to ignore this and keep hold of the lever until the  
465 target dimmed on the second or third dimming event (each after another 792-1331 ms for  
466 monkey 1; 792-1164 ms for monkeys 2 and 3; uniformly distributed).

467

#### 468 [Data acquisition and analysis](#)

469 We recorded from all cortical layers of visual areas V1 and V4 using 16-contact laminar  
470 electrodes (150 µm contact spacing, Atlas silicon probes). Out of a total of 77 V1 and 79 V4  
471 recording sessions, 73 recordings were conducted simultaneously in both areas. The  
472 electrodes were inserted perpendicular to the cortex on a daily basis.

473 Raw data were collected using Remote Cortex 5.95 and by Cheetah data acquisition  
474 interlinked with Remote Cortex 5.95. Neuronal data were acquired with Neuralynx  
475 preamplifiers and a Neuralynx Digital Lynx amplifier. Unfiltered data were sampled with 24  
476 bit at 32.7 kHz and stored to disc. Data were replayed offline, sampled with 16-bit and band-  
477 pass filtered at 0.5-300 Hz and down sampled to 1 kHz for local field potential (LFP) data,  
478 and filtered at 0.6-9 kHz for spike extraction. Eye position and pupil diameter was recorded  
479 at 220 Hz (ViewPoint, Arrington Research). Pupil diameter was recorded for 75 (90.4 %) of  
480 recordings.

481 All data analyses were performed using custom written Matlab (the Mathworks) scripts.

482

### 483 [Data preprocessing, trial selection and channel selection](#)

484 We corrected for any noise common to all channels via common average reference, in  
485 which the average of all channels is subtracted from each individual channel. We extracted  
486 population activity by progressively lowering spike extraction thresholds until approximately  
487 100 Hz spiking activity was detected on each channel between fixation onset and the first  
488 dimming event. Next, we computed the envelope of MUA (MUAe) by low-pass filtering  
489 (<300 Hz, fifth order Butterworth) the rectified 0.6-9 kHz filtered signal. Because we noticed  
490 that during some recording sessions the electrode seemed to have moved (e.g. due to  
491 movement of the monkey), we visually inspected the stability of each recording by  
492 investigating the stimulus aligned firing rates, MUAe and their baseline (-500 to -50 ms)  
493 energy across all trials and channels. With energy ( $E$ ) defined as:

$$494 \quad E = \int_i^t V(i)^2$$

495 , where  $t$  is the number of time points in the vector ( $V$ ) representing the single-trial  
496 histogram or MUAe. We selected the largest continuous time window that showed stable  
497 activity across all V1 & V4 channels.

498 In addition to selecting trials from stable periods, we selected channels for further  
499 processing that were determined to be in gray matter. Using current source density (CSD),  
500 we investigated on which channels currents were entering (sinks) and exiting (sources)  
501 cortical tissue, which allowed us to determine the relative recording depth compared to the  
502 known cortical anatomy (Schroeder, 1998; Schroeder et al., 1991). The CSD profile can be  
503 calculated according to the finite difference approximation, taking the inverse of the second  
504 spatial derivative of the stimulus-evoked voltage potential  $\varphi$ , defined by:

$$505 \quad CSD(x) = \frac{\varphi(x+h) - 2\varphi(x) + \varphi(x-h)}{h^2}$$

506 , where  $x$  is the depth at which the CSD is calculated and  $h$  the electrode spacing (150  $\mu\text{m}$ ).  
507 We used the iCSD toolbox (Pettersen et al., 2006) to compute the CSD. With this toolbox we  
508 used a spline fitting method to interpolate  $\varphi$  smoothly between electrode contacts. We

509 used a diameter of cortical columns of 500  $\mu\text{m}$  (Mountcastle, 1957), and tissue conductance  
510 of 0.4  $\text{Sm}^{-1}$  (Logothetis et al., 2007).

511 To aid determination of recording depth, we computed the signal-to-noise ratio (SNR), the  
512 response latencies to stimulus onset for each channel and the receptive field (RF) estimation  
513 (see below). SNR was computed as:

$$514 \quad SNR = \frac{\text{Signal} - \text{Noise}}{\sigma_{\text{noise}}}$$

515 , with *Signal* defined as the average MUAe amplitude in one of eight 50 ms time windows,  
516 from 30 to 80 ms, in 10 ms steps, to 100 to 150 ms after stimulus onset, and *Noise* as the  
517 average MUAe amplitude during the baseline period (-200 to 50 ms) before stimulus onset.  
518 SNR in at least one of these eight estimates was required to be higher than 3 for a channel  
519 to be included for further analyses.

520 We computed the response latency to stimulus onset for each channel according to the  
521 method described by Roelfsema et al. (2007). We fitted the visual response as a  
522 combination of an exponentially modified Gaussian and a cumulative Gaussian using a non-  
523 linear least-squares fitting procedure (function `lsqcurvefit`) to the average MUAe time  
524 course. There are two assumptions implicit in this method. First, the onset latency has a  
525 Gaussian distribution across trials and across neurons that contribute to the MUAe, and  
526 second, that (part of) the response dissipates exponentially. The visual response  $y$  across  
527 time  $t$  was modelled as:

$$528 \quad y(t) = d \cdot \text{Exp}(\mu\alpha + 0.5\sigma^2\alpha^2 - \alpha t) \cdot G(t, u + \sigma^2\alpha, \sigma) + c \cdot G(t, \mu, \sigma)$$

529 , where  $\mu$  is the mean,  $\sigma$  is the standard deviation,  $\alpha^{-1}$  is the time constant of the  
530 dissipation,  $G(t, \mu, \sigma)$  is a cumulative Gaussian, and  $c$  and  $d$  are the factors scaling the non-  
531 dissipating and dissipating modulation of the visual response. The response latency was  
532 defined as the time point where  $y(t)$  reached 33% of the maximum of the earliest peak, the  
533 first Gaussian (Roelfsema et al., 2007; Self et al., 2013). Data were aligned to the earliest  
534 current sink, the presumed thalamic input layer (L4); channels were excluded if they were  
535 >1 mm more superficial or >0.75 mm deeper than this layer.

536

### 537 Receptive field estimation

538 Offline RFs were determined for each channel via reverse correlation of the MUAe signal to  
539 stimuli ( $0.5 - 2^\circ$  black squares) presented on a  $9 \times 12$  grid (Gieselmann and Thiele, 2008).  
540 The stimulus-response map was converted to z-scores, after which the RF for each channel  
541 was indicated by a contour (thresholded at a z-score of 3) surrounding the peak activity.  
542 These z-scored maps were averaged across all channels for each area (the population  
543 average z-score was computed using Stouffer's Z-score method according to  $Z =$   
544  $\sum_{i=1}^k Z_i / \sqrt{k}$ , with  $k$  as the number of channels, after which we determined the overlap and  
545 separation between the V1 and V4 RFs (Fig 1B-C).

546

### 547 Bipolar re-referencing

548 To ensure that global signals, common to multiple channels, did not affect our LFP and  
549 spectral analyses (see below), we re-referenced our LFP signals according to the bipolar  
550 derivation. Bipolar re-referenced LFP signals (LFPb) were computed by taking the difference  
551 between two neighboring channels.

552

### 553 Attentional modulation

554 The effect of selective attention on neural activity was computed via an attention  
555 modulation index (*attMI*), defined as:

556 
$$attMI = \frac{A_{RF} - A_{out}}{A_{RF} + A_{out}}$$

557 , with  $A_{RF}$  as the neural activity when attention was directed towards the RF, and  $A_{out}$  the  
558 activity when attention was directed away from the RF. This index ranges from -1 to 1, with  
559 zero indicating no attentional modulation and with positive (negative) values indicating  
560 higher (lower) activity when attention was directed towards the RF.

561

### 562 Hidden Markov Model

563 To quantify On-Off dynamics in V1 and V4, we fit a Hidden Markov Model (HMM) to the  
564 population activity across all laminae. We fit the HMM both to activity from each individual

565 area, following the procedures described by Engel et al. (2016), as well as to the activity  
566 from both areas simultaneously.

567 Our HMM assumes that spike counts on the recorded channels can be well characterized as  
568 a doubly-stochastic process, of which the parameters can be accurately estimated (Rabiner,  
569 1989). In this study, spike counts on each channel are assumed to be produced by a Poisson  
570 process with different (constant) mean rates during On or Off phases of the underlying  
571 ‘hidden’ (latent) process  $s$  common to all channels that we need to infer (Engel et al., 2016).  
572 The mean firing rate on each channel  $j$  in phase  $s$  is defined by entry  $\lambda_j^s$  in the emission  
573 matrix  $\Lambda$ . The transition matrix  $P$  gives the probabilities of transitioning between these  
574 latent phases. In the transition matrix  $P$ , each entry indicates the probability of transitioning  
575 between two specific phases. For instance,  $P_{11}$  indicates the probability of transitioning  
576 from  $s = 0$  to  $s = 0$  (remaining in the Off phase), whereas  $P_{12}$  indicates the probability of  
577 transitioning from  $s = 0$  to  $s = 1$ , more formally:  $P_{11} = P_{off} = P(s_{t+1} = 0 | s_t = 0)$ ,  
578  $P_{12} = 1 - P_{off} = P(s_{t+1} = 1 | s_t = 0)$ . These probabilities do not depend on time: at any  
579 time step  $t$ , the probability of transitioning between phases depends only on the value of  $s$   
580 at time  $t$  ( $s_t$ ). The latent dynamics estimated by the HMM thus follow a discrete time series  
581 in which  $s_t$  summarises all information before time  $t$ . For each channel, MUA was  
582 discretized by determining spike counts in 10 ms bins following each time  $t$ , with the  
583 probability of observing spike count  $n$  on channel  $j$  during phase  $s$  defined as

584 
$$P(n|s) = \frac{(\lambda_j^s)^n}{n!} e^{-\lambda_j^s}$$

585 The full description of an HMM is given by the emission matrix  $\Lambda$ , transition matrix  $P$  and  
586 the probabilities  $\pi^0$  that indicate the initial values  $s_0$ , in which  $\pi_i^0 \equiv P(s_0 = i)$ . These  
587 parameters were estimated using the Expectation Maximization (EM) algorithm (Bishop,  
588 2006), maximizing the probability of observing the data given the model according to the  
589 Baum-Welch algorithm (Rabiner, 1989). Because the EM procedure can converge to a local  
590 maximum, rather than the global maximum, we repeated the EM procedure ten times with  
591 random parameter initializations, and chose the model with the highest likelihood. Random  
592 values were drawn from Dirichlet distributions for  $\pi^0$  and  $P$ , and from a uniform distribution  
593 between zero and twice the channel’s mean firing rate for  $\Lambda$ . The EM procedure was  
594 terminated if the relative change, computed as  $|new - original|/|original|$ , in the log-

595 likelihood was smaller than  $10^{-3}$  and the change in the transition and emission matrix was  
596 smaller than  $10^{-5}$ , or if it reached the maximum number of iterations ( $n = 500$ ).

597 Once the optimal parameters were estimated, we used the Viterbi algorithm to determine  
598 the most likely latent trajectory for each individual trial. We applied the HMM separately to  
599 each attention condition. For every trial, we applied the HMM during multiple time periods  
600 of the task, during fixation and during the time window from 400 ms after cue onset to 30  
601 ms after the first dimming event. For the behavioral analysis, we additionally analyzed the  
602 period up to 30 ms after the second dimming event for trials in which target dimming did  
603 not occur on the first dimming event, and for which the first distractor dimming was not  
604 inside the RFs.

605 To determine what number of latent phases best described the data, we fit HMMs with the  
606 number of phases ranging from 1 to 8, and used a four-fold cross-validation procedure to  
607 compute the leave-one-channel-out cross-validation error for each HMM (Engel et al.,  
608 2016). We fit the HMM to a randomly selected subset of 3/4 of the trials, and computed the  
609 cross-validation error on the remaining 1/4 of trials. This procedure was repeated 4 times  
610 using a different 3/4 of trials for training and 1/4 of trials for testing the HMM. We  
611 computed the cross-validation error  $CV_{var}$  for each channel  $j$  across all trials  $K$  and time  
612 bins  $T$  as the difference between the actual and expected spike count according to:

$$613 \quad CV_{var}[n_j] = \sum_{k=1}^K \sum_{t=1}^T (n_t^j - \lambda_j^{st})^2$$

614 We normalized  $CV_{var}$  to the error in the 1-phase HMM, averaged across channels, cross-  
615 validations and conditions, and determined the difference in  $CV_{var}$  with each additional  
616 phase in the HMM. The normalized mean cross-validation error across each of the eight  
617 HMM models for all recordings is depicted in Fig. S1. For most recordings, and for both V1  
618 and V4,  $CV_{var}$  decreased with the addition of a second phase, but did not decrease much  
619 further with additional phases. This allowed the identification of the elbow (kink) in this  
620 error plot as the model with two phases. We included areas/recordings for further analysis  
621 that revealed a reduction in cross-validation error of at least 10% with the addition of a  
622 second phase, but did not decrease by more than 10% with additional phases. For a small  
623 subset of recordings, a three or a four-phase model fit the data best; these recordings were  
624 excluded from further analysis. In total, we found a reduction of >10% in cross-validation



625 error when fitting a 2-phase versus 1-phase model in 64 V1 (83.1 %), and 73 V4 (92.4 %)  
626 recordings; in 57 (78.1 %) recordings we found evidence for a 2-phase model in both V1 and  
627 V4 (Fig. S1).

628 To investigate the across-area coordination of On-Off dynamics, we fit a 4-state HMM to V1  
629 and V4 data simultaneously. Across these four states, both V1 and V4 could be in either an  
630 Off or On phase, with the states defined as:  $V1_{off} - V4_{off}$  (state 1),  $V1_{on} - V4_{off}$  (state  
631 2),  $V1_{off} - V4_{on}$  (state 3) and  $V1_{on} - V4_{on}$  (state 4). This model was fit according to the  
632 same steps as the HMM applied to individual areas, with one exception. For each channel  $j$ ,  
633 the emission rate  $\lambda$  was constrained to be the same across states for which this channel  
634 (area) was in the same phase. For example, rates were constrained for a V1 channel across  
635 state 1 and state 3, during which V1 was in an Off phase ( $\lambda_j^{s=1} = \lambda_j^{s=3}$ ,  $j \in V1$ ).

636

### 637 [Testing the effect of On-Off dynamics on behavioral performance](#)

638 To determine the effect of On-Off dynamics and their across-area coordination on  
639 behavioral performance, we investigated whether the On/Off phase of population activity at  
640 the time of target dimming influenced reaction times (RT). To this end, we averaged, for  
641 each recording, the RT across all trials that ended in the same phase. We subsequently  
642 tested for a relationship between On/Off phase and RT across recordings (Statistical  
643 testing).

644

### 645 [Cross correlation](#)

646 The temporal relationship between On-Off time series and transitions, microsaccade onset  
647 times and activity in V1, V4 and FEF were investigated using cross-correlations. The cross-  
648 correlations based on HMM time series ( $CC_{HMM}$ ) were calculated using the function `xcorr` in  
649 Matlab, according to:

$$650 \quad CC_{HMM}(\tau) = \frac{1}{M} \sum_{m=1}^M \frac{\sum_{t=1}^T x(t)y(t+\tau)}{\sqrt{\sum_{t=1}^T |x(t)|^2 \cdot \sum_{t=1}^T |y(t)|^2}}$$

651 , where  $M$  is the number of trials,  $T$  is the number of discrete time bins,  $x$  and  $y$  the mean  
652 subtracted On-Off time series in V1 and V4 as determined by the HMM, and  $\tau$  the time lag.

653 Here, the numerator indicates the cross-covariance, which is normalized (the denominator)  
654 such that the autocorrelation for each time series at zero lag is 1. This procedure normalized  
655  $CC_{HMM}$  such that correlation coefficients were obtained. We furthermore subtracted the  
656 shuffle predictor  $CC_{shuffle}$  from  $CC_{HMM}$  to remove any task-related (event-locked)  
657 correlations between  $x$  and  $y$ .  $CC_{shuffle}$  was computed by shuffling  $y$  trials.

658 Cross-correlations ( $CC$ ) between state transitions and microsaccade onset times were  
659 computed in the same way but for a different normalization (denominator) factor. Here we  
660 normalized by the number of microsaccades, resulting  $CC$  to be of the order of coincidences  
661 of state transitions per microsaccade.

662 To investigate the neural activity around the time of On-Off transitions, we computed the  
663 transition-triggered average (TTA). The TTA was estimated by computing the cross  
664 covariance (the numerator), divided by the number of transitions for each channel  
665 (denominator). Again, we subtracted the shuffle predictor to remove any task-related  
666 correlations.

667

#### 668 Power estimation

669 We estimated the power spectra of the LFPb using a custom multitaper approach based on  
670 the Chronux toolbox (Bokil et al., 2010). We estimated the power separately for On and Off  
671 states determined by the HMM using only epochs that lasted longer than 250 ms. Because  
672 epoch durations were variable, we zero-padded each segment to the next highest power of  
673 2 of the longest epoch duration (2048 time points), ensuring we could extract the same  
674 frequencies for each segment. This approach gave us a half bandwidth ( $W$ ) of approximately  
675 1.95 Hz, according to  $W = (K + 1)/2T$ , with  $K$  being the number of data tapers ( $K = 7$ ) and  
676  $T$  the length of the time window in seconds. Frequencies were estimated from 4 to 200 Hz.

677

#### 678 Microsaccade detection

679 We low-pass filtered the horizontal and vertical eye traces at 30 Hz (2<sup>nd</sup> order Butterworth  
680 filter) after which we detected microsaccades by using the algorithm developed by Engbert  
681 and Kliegl (2003). This algorithm converts eye position to velocity and classifies an eye  
682 movement as a microsaccade if the velocity is larger than a threshold for at least three

683 consecutive time points. The threshold is set to 6 times the median estimator, given by:  
684  $\sqrt{\text{median}(x^2) - \text{median}(x)^2}$ , where  $x$  is the eye position channel. Thus, the threshold is  
685 determined for each single trial. The use of the median estimator ensured that  
686 microsaccade detection is relatively robust to different levels of noise.

687

## 688 Statistical testing

689 To determine whether there were significant differences between attention conditions or  
690 HMM states (e.g. in firing rate or epoch duration) we made use of multiple statistical  
691 methods. We used (paired-sample) Wilcoxon signed rank tests whenever a comparison was  
692 made between two conditions (e.g. attend RF versus attend away), or to test whether a  
693 distribution was significantly different from zero. When a comparison involved multiple  
694 conditions, or multiple factors (e.g. attention and state), we used linear mixed effect models  
695 to test for main effects of each condition/factor and interaction effects between factors.  
696 These factors were defined as fixed effects and we included random intercepts for each  
697 recording as random effects, accounting for the repeated measurements within each  
698 recording. Specifically, we modelled RT as a linear combination of attention condition ( $Att$ )  
699 and HMM state coefficients, as well as their interaction:

$$700 \quad RT \sim \beta_0 + \beta_1 Att + \beta_2 HMM + \beta_3 Att \cdot HMM$$

701 We used false discovery rate (FDR) to correct for multiple comparisons (Benjamini and  
702 Yekutieli, 2001). Error bars in all figures indicate the standard error of the mean (SEM).

703

704

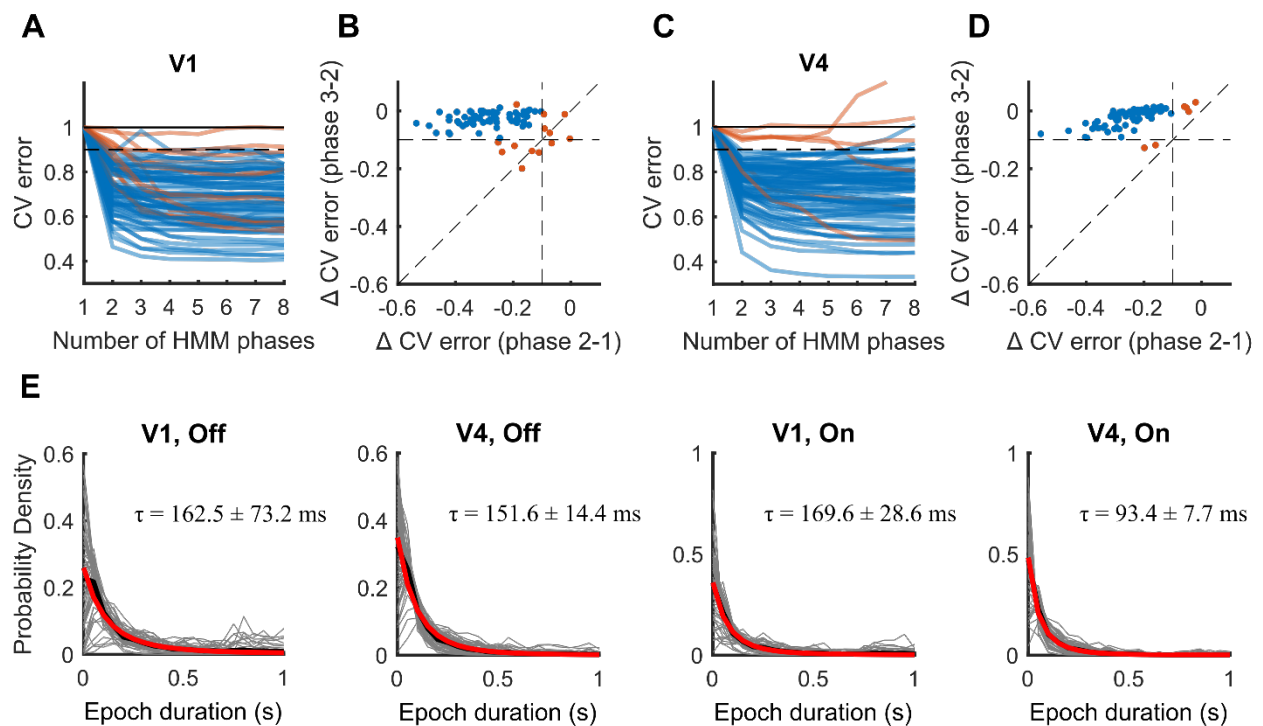

705

706 **Fig. S1. Determining the number of HMM phases and their epoch durations in V1 and**

707 **V4 MUA. (A)** Cross validation (CV) error plotted against the number of phases in each

708 HMM for V1. **(B)** The difference in cross validation error between the 1-phase and 2-phase

709 model, plotted against the difference between the 2-phase and 3-phase model for V1. Most

710 recordings show a large reduction in cross-validation error with the addition of a second

711 phase, and only marginal changes with additional phases. Blue (red) lines and markers

712 indicate the recordings included (excluded) for further analysis. **(C-D)** Same conventions as

713 **(A-B)** but for V4. **(E)** Distributions of Off and On episode durations overlaid by the

714 exponential distributions with the decay constant set by the HMM transition probabilities

715 (red,  $N(t) = N_0 e^{-t/\tau}$ , where  $N_0$  is the normalization constant, and  $\tau$  is the decay time-

716 constant computed for each recording and phase). A good match for these models indicates

717 that On-Off dynamics were not driven by an oscillatory phenomenon. Grey and thick black

718 lines indicate individual recordings and their mean, respectively.

719

720

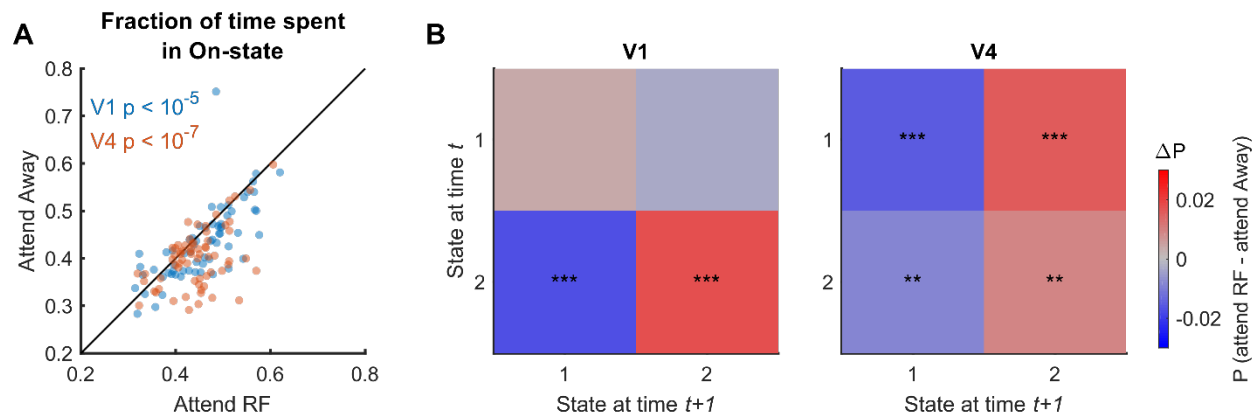

721

722 **Fig. S2. Attentional modulation of HMM parameters.** (A) The fraction of time spent in an  
723 On phase is increased when attention is directed towards the RFs. (B) Attentional influence  
724 on HMM transition probabilities. Shown is the difference between transition matrices (attend  
725 RF – attend Away). Statistics: Wilcoxon signed rank tests; \*, \*\*, \*\*\*, indicate FDR corrected  
726 significance levels of  $p < 0.05$ ,  $p < 0.01$  and  $p < 0.001$ , respectively.

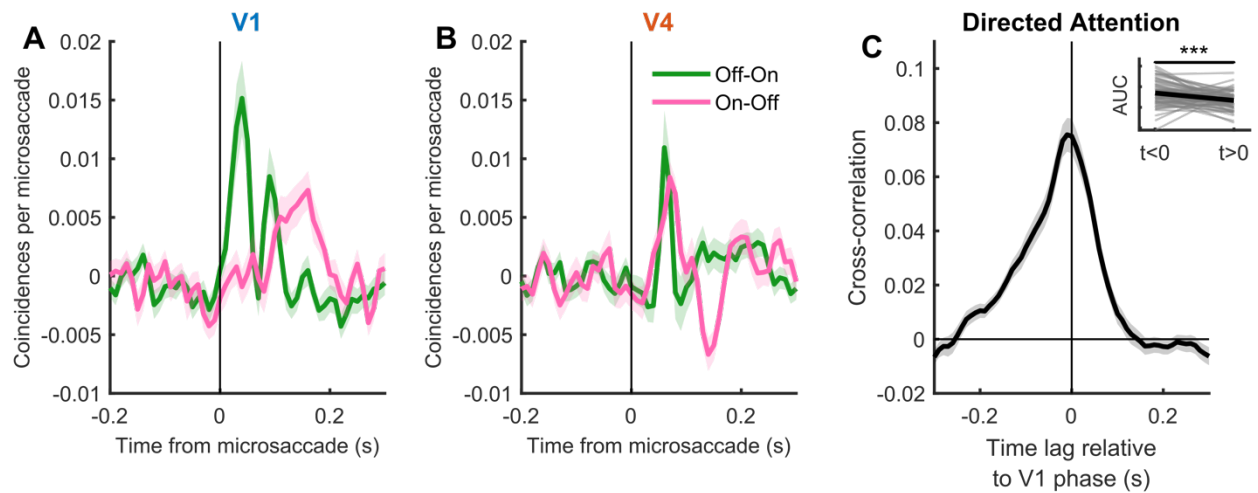

727

728 **Fig. S3. Relationship between microsaccades and On-Off transitions.** (A) Cross-  
729 correlation of On-Off transitions in V1 triggered to microsaccade onset. (B) Same as panel A,  
730 but for On-Off transitions in V4. (C) Cross-correlation between time series of On-Off  
731 dynamics in V1 and V4 after exclusion of trials in which microsaccades occurred. Statistics:  
732 Wilcoxon signed rank test. Shaded regions denote  $\pm 1$  SEM across recordings, \*, \*\* and \*\*\*  
733 indicate significance levels of  $p < 0.05$ ,  $p < 0.01$  and  $p < 0.001$  respectively.

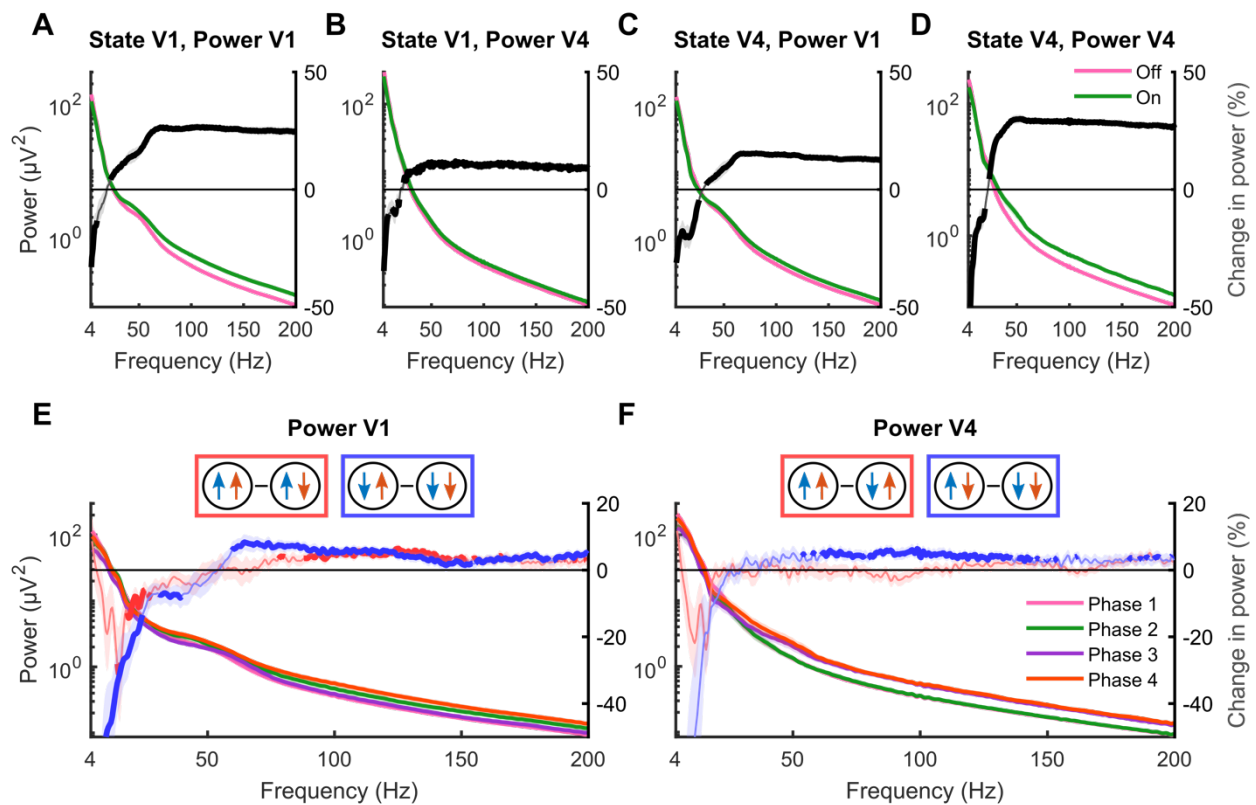

734

735 **Fig. S4. Bipolar re-referenced LFP power spectrum across HMM states.** (A) Power in  
 736 V1 during On and Off phases in V1. (B) Power in V4 during On and Off phases in V1. (C)  
 737 Power in V1 during On and Off phases in V4. (D) Power in V4 during On and Off phases in  
 738 V4. Right y-axis indicates the percentage change in power during On versus Off phases (On-  
 739 Off). (E-F) Power spectrum in V1 (E) and V4 (F) for the 4-state HMM fit across V1 and V4  
 740 and the within-area power difference between On phases (red, V1: state 4-2; V4: state 4-3),  
 741 or Off phases (blue, V1: state 3-1; V4: state 2-1). Only On/Off episodes of at least 250 ms  
 742 were included. Thick percentage change lines indicate significantly modulated frequencies ( $p$   
 743  $< 0.05$ , Wilcoxon signed rank test, FDR corrected). Shaded regions denote  $\pm 1$  SEM.

744

745

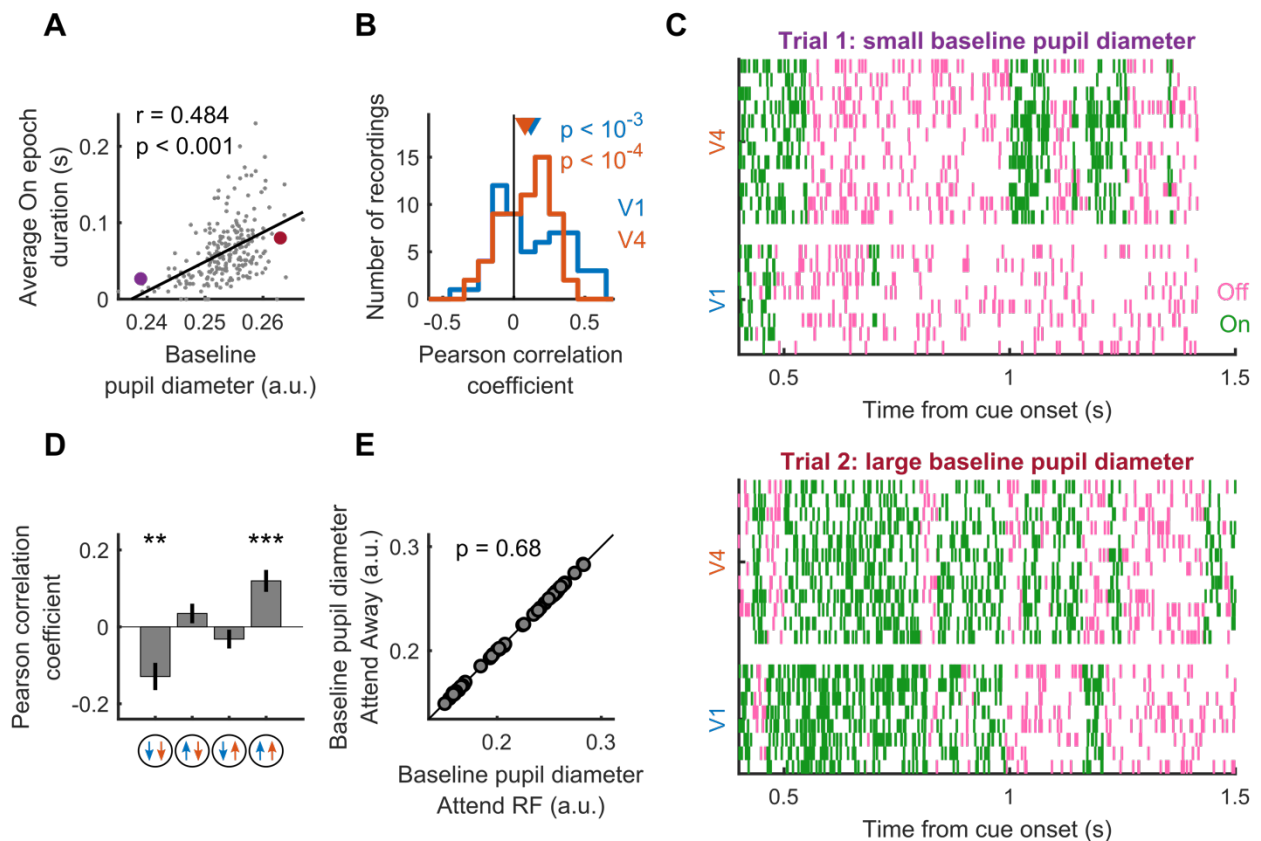

746

747 **Fig. S5. The relationship between baseline pupil diameter and On/Off episode**

748 **durations.** (A) Example recording showing that baseline pupil diameter is positively

749 correlated to the average On episode duration in V1. Each dot represents one single trial,  $r$  is

750 the Pearson correlation coefficient. The purple and red dot indicate the example trials used in

751 panel C. (B) Across recordings, the average duration of On epochs in both V1 and V4 is

752 positively correlated with the size of the baseline pupil diameter. (C) Two example trials in

753 which the average On epoch duration is larger on the trial with larger (bottom) compared to

754 the trial with smaller (top) baseline pupil diameter. (D) Across recordings, baseline pupil

755 diameter is negatively (positively) correlated with the average epoch duration when both V1

756 and V4 are in an Off (On) phase. (E) The average baseline pupil diameter during attend RF

757 conditions plotted against attend away conditions. There is no difference between attention

758 conditions. Each dot represents a recording session. Statistics: Wilcoxon signed rank test

759 (FDR corrected) (B, D, E) and Pearson correlation (A). Error bars and shaded regions denote

760  $\pm 1$  SEM, and \*, \*\* and \*\*\* indicate significance levels of  $p < 0.05$ ,  $p < 0.01$  and  $p < 0.001$

761 respectively.

762

763



764

|                                                 | <b>Red</b>                                | <b>Green</b>                             | <b>Blue</b>                                   |
|-------------------------------------------------|-------------------------------------------|------------------------------------------|-----------------------------------------------|
| <b>Monkey 2 &amp; 3,<br/>and monkey 1 (n=4)</b> | a. [220 0 0] – 12.8<br>b. [140 0 0] – 4.2 | a. [0 135 0] – 12.9<br>b. [0 90 0] – 4.6 | a. [60 60 255] – 12.2<br>b. [30 30 180] – 4.6 |
| <b>Monkey 1 (n=1)</b>                           | b. [170 0 0] – 6.7                        | b. [0 105 0] – 6.4                       | b. [37 37 210] – 6.6                          |
| <b>Monkey 1 (n=1)</b>                           | b. [175 0 0] – 7.2                        | b. [0 105 0] – 6.4                       | b. [40 40 220] – 7.7                          |
| <b>Monkey 1 (n=8)</b>                           | b. [180 0 0] – 7.7                        | b. [0 110 0] – 7.3                       | b. [40 40 220] – 7.7                          |

765 **Table S1.**

766 Color values used for the 3 colored gratings across recording sessions and subjects, indicated  
767 as [RGB] – luminance (cd/m<sup>2</sup>). a = Undimmed values, b = Dimmed values. For monkey 1,  
768 we used a variety of dimmed values across recordings.

769
